# Supplementary material
Source: MDPI journal article supplement (https://www.mdpi.com/2306-5729/6/2/19)
Supplement: s1 [file s1]

## Sheet: Foglio1
Year	Piedmont	Valle d'Aosta	Liguria	Lombardy	Trentino-Alto Adige	Veneto	Friuli-Venezia Giulia	Emilia-Romagna	Tuscany	Umbria	Marche	Latium	Abruzzo	Molise	Campania	Apulia	Basilicata	Calabria	Sicily	Sardinia
1952	1.48965	1.82334	1.38622	1.89779	2.52163	2.36628	1.75088	1.68523	1.64392	1.8502	2.01267	2.20777	2.45994	2.45994	3.17849	3.3803	3.49376	3.38845	2.96159	3.80477
1953	1.46717	1.86768	1.42347	1.85579	2.47643	2.33865	1.78222	1.65426	1.63086	1.89216	1.9751	2.16735	2.32352	2.32352	3.16862	3.35547	3.3534	3.43115	2.8945	3.74367
1954	1.50259	1.85217	1.37839	1.85591	2.43166	2.32272	1.73481	1.66025	1.67217	1.8926	1.97568	2.23166	2.38392	2.38392	3.29666	3.36677	3.3793	3.47825	3.07574	3.78107
1955	1.51427	1.76809	1.38503	1.84115	2.45561	2.29642	1.72154	1.68164	1.66197	1.83501	1.99035	2.20574	2.32463	2.32463	3.23292	3.36896	3.28157	3.41539	3.05329	3.61977
1956	1.57061	1.69832	1.43441	1.87139	2.488	2.34188	1.79679	1.71644	1.68775	1.87333	2.0318	2.17729	2.27959	2.27959	3.12038	3.30667	3.37129	3.39314	3.01958	3.63021
1957	1.59396	1.65245	1.47783	1.88943	2.53931	2.30132	1.74776	1.70855	1.68055	1.79122	1.96276	2.1895	2.24525	2.24525	3.18744	3.27437	3.1892	3.38696	3.01895	3.58759
1958	1.59792	1.6506	1.50174	1.88152	2.49988	2.29185	1.79494	1.69556	1.70769	1.79469	1.97668	2.17878	2.23248	2.23248	3.18733	3.17492	3.07146	3.22957	2.98995	3.48331
1959	1.62936	1.75402	1.53804	1.95329	2.62986	2.44619	1.88746	1.76755	1.77268	1.88338	2.00729	2.23935	2.28777	2.28777	3.23265	3.26171	3.15472	3.41328	3.04068	3.46236
1960	1.64788	1.72613	1.56349	1.98093	2.67317	2.43352	1.90675	1.78867	1.7888	1.95549	2.02694	2.24895	2.34561	2.34561	3.26658	3.25899	3.18968	3.45752	3.15	3.4534
1961	1.72912	1.89324	1.60577	2.01297	2.66128	2.46062	1.89807	1.84012	1.83574	1.8899	2.04391	2.34731	2.2744	2.2744	3.24196	3.2198	3.06937	3.30867	3.03081	3.40843
1962	1.86215	1.90771	1.74432	2.11525	2.71068	2.48781	1.92724	1.91769	1.881	1.92884	2.01709	2.41947	2.29676	2.29676	3.33509	3.2218	3.09901	3.33384	3.02883	3.33274
1963	2.01482	2.07595	1.91343	2.27192	2.90439	2.58312	2.07272	1.9986	1.97742	1.9684	2.10724	2.51221	2.63956	2.63956	3.40026	3.28699	3.00383	3.25846	2.99717	3.34357
1964	2.22293	2.29946	2.07232	2.42532	3.01018	2.71903	2.25597	2.12579	2.1276	2.09067	2.23655	2.66663	2.51943	2.69693	3.5723	3.48922	3.21333	3.40458	3.10285	3.41741
1965	2.16934	2.15791	2.06133	2.41769	3.02276	2.69355	2.22307	2.07675	2.11829	2.1283	2.2016	2.60044	2.53322	2.63939	3.52661	3.42849	3.18123	3.33406	3.0381	3.34812
1966	2.13111	2.22273	2.03069	2.3865	2.87376	2.60977	2.12754	2.05925	2.08708	2.04838	2.156	2.56019	2.47659	2.62967	3.47648	3.36789	3.10611	3.30087	3.0542	3.30932
1967	2.08103	2.12415	1.89373	2.26494	2.76978	2.49446	2.01363	1.97853	2.00923	1.9466	2.10107	2.45049	2.3995	2.52462	3.41494	3.2629	3.12176	3.18967	3.00359	3.19518
1968	2.12406	2.12441	1.90393	2.22917	2.71457	2.46792	1.98085	1.96596	1.97196	1.95642	2.09994	2.37281	2.35765	2.44711	3.33912	3.20415	3.05077	3.12243	2.95791	3.06126
1969	2.14751	2.22207	1.93704	2.22563	2.71412	2.49971	2.0425	1.97948	1.98345	1.99954	2.13296	2.40353	2.40937	2.47568	3.3341	3.1523	3.10999	3.15801	3.00099	3.07245
1970	2.08933	2.21423	1.87805	2.14903	2.55405	2.39132	2.02679	1.96451	1.95312	1.92013	2.11273	2.35299	2.35016	2.40888	3.19955	3.02524	2.91302	2.98786	2.89676	2.92021
1971	2.11168	2.10691	1.90262	2.1148	2.51071	2.35358	1.98991	1.97758	1.98683	1.96939	2.11456	2.32857	2.37951	2.39787	3.20192	2.99047	2.88644	2.933	2.85721	2.92271
1972	2.05241	2.12132	1.86901	2.1005	2.38685	2.29453	2.01584	1.93264	1.98078	1.95075	2.04643	2.3062	2.33027	2.41964	3.10998	2.88149	2.79215	2.87963	2.7642	2.86518
1973	2.02811	2.03501	1.80527	2.10124	2.31749	2.26332	1.96578	1.90525	1.96833	1.95046	2.01467	2.29056	2.31827	2.35238	3.05219	2.87998	2.72641	2.79717	2.7511	2.935
1974	2.03043	2.03123	1.79444	2.09549	2.25848	2.24948	1.97424	1.90141	1.94092	1.96148	2.02734	2.27131	2.25515	2.43775	2.99421	2.94738	2.72847	2.75312	2.75891	2.81631
1975	1.94115	1.92024	1.67829	2.00087	2.10238	2.05056	1.80667	1.75342	1.84337	1.88984	1.93697	2.14085	2.13631	2.2813	2.82431	2.81353	2.63742	2.63498	2.64396	2.67279
1976	1.79195	1.76032	1.52271	1.83308	1.9354	1.91289	1.66466	1.62564	1.713	1.80921	1.8531	1.97444	2.1197	2.19387	2.93238	2.73585	2.56656	2.62931	2.55941	2.53728
1977	1.67019	1.64734	1.42515	1.70864	1.82412	1.80967	1.51053	1.50869	1.58401	1.71471	1.77111	1.87715	1.98017	2.09157	2.65186	2.5818	2.38616	2.49793	2.40855	2.40182
1978	1.53956	1.69344	1.31421	1.59569	1.75907	1.68129	1.47346	1.39618	1.51732	1.65912	1.71441	1.7536	1.92345	2.00669	2.52065	2.49707	2.27486	2.37382	2.328	2.24793
1979	1.41779	1.40384	1.17845	1.47523	1.65915	1.53289	1.32869	1.27541	1.40559	1.54076	1.61516	1.67726	1.86121	1.99778	2.41648	2.35378	2.13559	2.33699	2.25541	2.07628
1980	1.33741	1.37117	1.10928	1.39886	1.66534	1.45318	1.24964	1.18114	1.3151	1.48911	1.51864	1.59227	1.73849	1.82036	2.34465	2.23811	2.04039	2.25396	2.21824	1.9895
1981	1.27344	1.17725	1.09318	1.33148	1.59705	1.37675	1.16345	1.12111	1.24549	1.45745	1.44785	1.49414	1.72074	1.81195	2.226	2.12119	2.01649	2.15489	2.04006	1.86822
1982	1.28271	1.28059	1.07962	1.32879	1.61266	1.37265	1.17708	1.10723	1.22999	1.42296	1.43114	1.50215	1.70806	1.75582	2.31021	2.04338	2.02441	2.14741	2.07024	1.80974
1983	1.20655	1.2466	1.06153	1.2919	1.53006	1.30281	1.12336	1.07534	1.18981	1.44202	1.37405	1.45367	1.63258	1.69636	2.16249	1.95859	1.91337	2.06836	1.97816	1.744
1984	1.15321	1.17773	1.02763	1.23349	1.46509	1.24895	1.12666	1.03623	1.1413	1.31095	1.30381	1.39874	1.59035	1.64216	2.07783	1.89705	1.86182	2.00583	1.96132	1.63632
1985	1.14746	1.1601	1.01859	1.20996	1.44928	1.24762	1.07681	1.01607	1.14417	1.30714	1.29949	1.33614	1.54589	1.60643	2.02294	1.78065	1.77201	1.92492	1.93882	1.56793
1986	1.09026	1.13284	0.962263	1.13411	1.39091	1.15775	1.01927	0.951149	1.06225	1.22412	1.24603	1.27282	1.43857	1.52519	1.92521	1.70956	1.68281	1.82801	1.84492	1.47973
1987	1.06108	1.14612	0.981748	1.12213	1.38375	1.1038	0.969423	0.93426	1.0537	1.17941	1.19068	1.26145	1.38683	1.53865	1.89749	1.71383	1.70149	1.77847	1.8384	1.43028
1988	1.09833	1.21975	1.01535	1.15804	1.39937	1.17888	1.05011	0.971351	1.10457	1.24245	1.22256	1.29182	1.41167	1.52912	1.92237	1.72024	1.6725	1.85328	1.82728	1.41641
1989	1.06764	1.10195	1.00085	1.1301	1.37875	1.13371	1.03079	0.962741	1.04802	1.20663	1.18791	1.26579	1.37569	1.46741	1.83975	1.63793	1.66908	1.80332	1.84435	1.3671
1990	1.10063	1.18345	1.01054	1.14687	1.40251	1.15956	1.02885	1.01289	1.08217	1.17462	1.22868	1.28021	1.3925	1.42239	1.80822	1.65334	1.65832	1.74223	1.85211	1.36982
1991	1.12067	1.15229	1.0045	1.11905	1.40748	1.11076	1.02109	1.00505	1.04965	1.15672	1.20176	1.22677	1.34383	1.39647	1.79756	1.59482	1.54494	1.65562	1.76596	1.28392
1992	1.07594	1.10232	1.02681	1.1152	1.41544	1.13121	1.03909	0.992637	1.04569	1.1724	1.18111	1.24775	1.33728	1.41087	1.776	1.5772	1.54868	1.63759	1.78044	1.21211
1993	1.04924	1.00836	0.968141	1.08831	1.34547	1.09024	0.962616	0.972227	1.0207	1.11478	1.13084	1.2029	1.29549	1.32639	1.65826	1.48634	1.41866	1.55836	1.66819	1.1596
1994	1.03395	1.07933	0.944461	1.06291	1.34251	1.06561	0.948606	0.962545	0.988077	1.088	1.09102	1.16905	1.25396	1.28676	1.60836	1.44358	1.34951	1.42909	1.5637	1.08941
1995	1.04047	1.0951	0.94282	1.06905	1.34063	1.0749	0.950863	0.971294	0.989629	1.08236	1.11201	1.11464	1.1864	1.22245	1.51841	1.38303	1.31464	1.397	1.48803	1.06171
1996	1.06319	1.19186	0.969712	1.10033	1.38762	1.10765	0.988354	1.01186	1.00946	1.0898	1.09214	1.13578	1.20663	1.17981	1.59083	1.38372	1.26082	1.35281	1.50347	1.03342
1997	1.0986	1.09303	0.975704	1.13671	1.4218	1.13671	1.00984	1.04004	1.04693	1.10618	1.13737	1.14488	1.19507	1.20367	1.53804	1.36953	1.29629	1.34711	1.48878	1.03263
1998	1.10575	1.17032	0.985821	1.13698	1.41174	1.15324	1.02745	1.05427	1.04886	1.10633	1.14979	1.12357	1.16697	1.19867	1.49801	1.33999	1.23082	1.31581	1.43718	0.992653
1999	1.11536	1.19131	0.987629	1.1621	1.45208	1.16574	1.04019	1.09739	1.06486	1.14108	1.15499	1.2292	1.14018	1.18419	1.49246	1.33034	1.22555	1.25437	1.44123	1.02874
2000	1.16771	1.27831	1.03491	1.21021	1.45588	1.21677	1.10148	1.16961	1.12122	1.17019	1.18055	1.19634	1.15896	1.15206	1.47877	1.35223	1.24633	1.26099	1.41267	1.05794
2001	1.15218	1.21797	1.06327	1.22135	1.45588	1.19697	1.10235	1.18621	1.1298	1.17215	1.1503	1.17351	1.16821	1.11986	1.48679	1.34209	1.2151	1.23625	1.39655	1.03648
2002	1.19497	1.23879	1.09138	1.25428	1.44523	1.24211	1.11933	1.23503	1.17969	1.23483	1.21538	1.19935	1.14499	1.14533	1.47168	1.30294	1.24082	1.23219	1.39687	1.02634
2003	1.2161	1.28667	1.10429	1.2702	1.46257	1.25575	1.16028	1.23534	1.16251	1.22839	1.23673	1.25896	1.1894	1.15575	1.48656	1.30364	1.20919	1.26685	1.42949	1.06745
2004	1.2667	1.3309	1.17326	1.36033	1.55424	1.36355	1.20726	1.32034	1.28229	1.31285	1.28402	1.2998	1.20826	1.1431	1.4929	1.3448	1.2343	1.27445	1.44077	1.04552
2005	1.27829	1.3381	1.19198	1.36517	1.54671	1.36009	1.23618	1.35166	1.28259	1.33972	1.29779	1.27938	1.22914	1.14806	1.45251	1.30061	1.16354	1.26474	1.43418	1.06795
2006	1.33086	1.44701	1.24392	1.43073	1.54716	1.40578	1.29168	1.39988	1.30967	1.36717	1.34196	1.35185	1.23456	1.14278	1.46777	1.28851	1.20172	1.29718	1.42841	1.0859
2007	1.37499	1.47747	1.28513	1.47351	1.57485	1.4434	1.34422	1.451	1.3551	1.40452	1.38076	1.35711	1.28493	1.17844	1.47743	1.32171	1.20309	1.29528	1.41999	1.11241
2008	1.41892	1.57381	1.3548	1.53572	1.61631	1.49131	1.36278	1.51332	1.42315	1.45021	1.42504	1.47869	1.32539	1.18819	1.47286	1.34331	1.23388	1.29652	1.45404	1.13628
2009	1.43366	1.62765	1.3643	1.5669	1.58767	1.49113	1.38361	1.53666	1.3891	1.38652	1.4391	1.44282	1.30748	1.1369	1.46832	1.35463	1.20449	1.31593	1.45222	1.16631
2010	1.44328	1.62531	1.36859	1.57059	1.64699	1.49635	1.40082	1.53956	1.42194	1.42035	1.42169	1.45585	1.36618	1.23576	1.45336	1.34666	1.20268	1.32172	1.43557	1.194
2011	1.44695	1.60114	1.3426	1.52792	1.62157	1.47877	1.38479	1.50399	1.40193	1.4	1.42266	1.48469	1.34849	1.19138	1.4283	1.3235	1.19328	1.29552	1.423	1.17495
2012	1.43409	1.56587	1.37673	1.50641	1.63127	1.46423	1.38979	1.47474	1.39495	1.38315	1.36652	1.45922	1.33981	1.17816	1.3925	1.28961	1.19861	1.28901	1.40566	1.13554
2013	1.4113	1.4354	1.3427	1.48148	1.62427	1.42137	1.37279	1.45376	1.34606	1.36578	1.34411	1.42482	1.30215	1.17104	1.35483	1.27673	1.12415	1.27824	1.36397	1.11294
2014	1.39782	1.53646	1.33122	1.45739	1.64224	1.40896	1.37611	1.42001	1.34853	1.32369	1.34734	1.35358	1.28802	1.16407	1.32333	1.27987	1.14952	1.27417	1.38149	1.09538
2015	1.36	1.4	1.3	1.44	1.63	1.38	1.32	1.42	1.3	1.27	1.33	1.32	1.28	1.17	1.34	1.24	1.17	1.29	1.35	1.09
2016	1.35	1.41	1.3	1.42	1.64	1.38	1.33	1.4	1.3	1.26	1.32	1.33	1.28	1.15	1.34	1.25	1.17	1.28	1.33	1.07
2017	1.34	1.35	1.28	1.39	1.62	1.36	1.31	1.35	1.28	1.24	1.25	1.27	1.24	1.19	1.35	1.24	1.19	1.28	1.35	1.06
2018	1.28	1.38	1.23	1.35	1.59	1.33	1.28	1.34	1.25	1.21	1.22	1.22	1.19	1.09	1.31	1.22	1.13	1.26	1.34	1.02
2019	1.3	1.31	1.21	1.36	1.57	1.32	1.23	1.35	1.25	1.23	1.2	1.27	1.18	1.15	1.31	1.22	1.15	1.26	1.32	1.03
